# Supplementary material for: Analysis of Pollen Concentrations from Various Tree Pollen Types and Their Interrelation with Different Airborne Pollutants in the Madrid Region (Spain)
Source: MDPI journal article supplement (doi:10.3390/su14095259), 2022-04-27
Supplement: s1 [file s1]

**Table S1.** Correlations between the variables “pollen type” and “airborne pollutant” for the period 2013-2017 and for each of the study zones, designated with the name of the stations in the Palinocam Network (significant results shaded in orange).

| PALINOCAM NETWORK STATION | Airborne pollutant                    | <i>Cupressa-ceae</i>      | <i>Olea</i>               | <i>Pinus</i>              | <i>Platanus</i>           | <i>Populus</i>            | <i>Ulmus</i>              |
|---------------------------|---------------------------------------|---------------------------|---------------------------|---------------------------|---------------------------|---------------------------|---------------------------|
| ALCALÁ DE HENARES         | Ozone (O <sub>3</sub> )               | -0.4004<br>(60)<br>0.0021 | 0.6671<br>(60)<br>0.0000  | 0.7410<br>(60)<br>0.0000  | 0.4107<br>(60)<br>0.0016  | 0.0031<br>(60)<br>0.9807  | -0.1925<br>(60)<br>0.1392 |
|                           | Nitrogen dioxide (NO <sub>2</sub> )   | 0.2498<br>(60)<br>0.0551  | -0.5604<br>(60)<br>0.0000 | -0.6848<br>(60)<br>0.0000 | -0.4447<br>(60)<br>0.0006 | -0.0167<br>(60)<br>0.8978 | 0.2456<br>(60)<br>0.0592  |
|                           | Particles <10µm (PM <sub>10</sub> )   | -0.4416<br>(60)<br>0.0007 | 0.0486<br>(60)<br>0.7089  | -0.2680<br>(60)<br>0.0395 | -0.2153<br>(60)<br>0.0982 | -0.3697<br>(60)<br>0.0045 | -0.2882<br>(60)<br>0.0268 |
|                           | Particles <2.5µm (PM <sub>2.5</sub> ) | ND                        | ND                        | ND                        | ND                        | ND                        | ND                        |
|                           | Carbon monoxide (CO)                  | 0.4047<br>(60)<br>0.0019  | -0.5149<br>(60)<br>0.0001 | -0.6299<br>(60)<br>0.0000 | -0.4416<br>(60)<br>0.0007 | 0.0762<br>(60)<br>0.5582  | 0.4044<br>(60)<br>0.0019  |
|                           | Sulphur dioxide (SO <sub>2</sub> )    | 0.5381<br>(60)<br>0.0000  | -0.3596<br>(60)<br>0.0057 | -0.1931<br>(60)<br>0.1379 | 0.0203<br>(60)<br>0.8763  | 0.2593<br>(60)<br>0.0464  | 0.3897<br>(60)<br>0.0028  |
|                           |                                       |                           |                           |                           |                           |                           |                           |
| ALCOBENDAS                | Ozone (O <sub>3</sub> )               | -0.4145<br>(60)<br>0.0015 | 0.7066<br>(60)<br>0.0000  | 0.7060<br>(60)<br>0.0000  | 0.4807<br>(60)<br>0.0002  | 0.1760<br>(60)<br>0.1765  | -0.0784<br>(60)<br>0.5470 |
|                           | Nitrogen dioxide (NO <sub>2</sub> )   | 0.3727<br>(60)<br>0.0042  | -0.6436<br>(60)<br>0.0000 | -0.7075<br>(60)<br>0.0000 | -0.4835<br>(60)<br>0.0002 | -0.2074<br>(60)<br>0.1112 | 0.0679<br>(60)<br>0.6022  |
|                           | Particles <10µm (PM <sub>10</sub> )   | -0.2179<br>(60)<br>0.0942 | -0.1240<br>(60)<br>0.3408 | -0.3467<br>(60)<br>0.0078 | -0.3272<br>(60)<br>0.0119 | -0.4246<br>(60)<br>0.0011 | -0.4274<br>(60)<br>0.0010 |
|                           | Particles <2.5µm (PM <sub>2.5</sub> ) | ND                        | ND                        | ND                        | ND                        | ND                        | ND                        |
|                           | Carbon monoxide (CO)                  | 0.2901<br>(24)<br>0.1641  | -0.5538<br>(24)<br>0.0079 | -0.5512<br>(24)<br>0.0082 | -0.3475<br>(24)<br>0.0956 | 0.0995<br>(24)<br>0.6632  | 0.1941<br>(24)<br>0.3519  |
|                           | Sulphur dioxide (SO <sub>2</sub> )    | 0.0252<br>(24)<br>0.9037  | -0.0502<br>(24)<br>0.8096 | -0.1740<br>(24)<br>0.4041 | 0.2469<br>(24)<br>0.2364  | 0.0259<br>(24)<br>0.9011  | -0.1027<br>(24)<br>0.6223 |
|                           |                                       |                           |                           |                           |                           |                           |                           |
| ARANJUEZ                  | Ozone (O <sub>3</sub> )               | -0.4742<br>(60)<br>0.0003 | 0.7608<br>(60)<br>0.0000  | 0.6831<br>(60)<br>0.0000  | 0.3319<br>(60)<br>0.0108  | 0.0670<br>(60)<br>0.6070  | -0.1388<br>(60)<br>0.2864 |
|                           | Nitrogen dioxide (NO <sub>2</sub> )   | 0.2418<br>(60)<br>0.0633  | -0.5914<br>(60)<br>0.0000 | -0.7288<br>(60)<br>0.0000 | -0.4061<br>(60)<br>0.0018 | -0.2320<br>(60)<br>0.0748 | -0.0464<br>(60)<br>0.7216 |
|                           | Particles <10µm (PM <sub>10</sub> )   | -0.6167<br>(60)<br>0.0000 | 0.1818<br>(60)<br>0.1625  | -0.0762<br>(60)<br>0.5584 | -0.2411<br>(60)<br>0.0641 | -0.4151<br>(60)<br>0.0014 | -0.5084<br>(60)<br>0.0001 |
|                           | Particles <2.5µm (PM <sub>2.5</sub> ) | ND                        | ND                        | ND                        | ND                        | ND                        | ND                        |
|                           |                                       |                           |                           |                           |                           |                           |                           |

|                            |                                       |                           |                           |                           |                           |                           |                           |
|----------------------------|---------------------------------------|---------------------------|---------------------------|---------------------------|---------------------------|---------------------------|---------------------------|
|                            | Carbon monoxide (CO)                  | ND                        | ND                        | ND                        | ND                        | ND                        | ND                        |
|                            | Sulphur dioxide (SO <sub>2</sub> )    | ND                        | ND                        | ND                        | ND                        | ND                        | ND                        |
| COSLADA                    | Ozone (O <sub>3</sub> )               | -0.5451<br>(60)<br>0.0000 | 0.6921<br>(60)<br>0.0000  | 0.6495<br>(60)<br>0.0000  | 0.3520<br>(60)<br>0.0069  | 0.0625<br>(60)<br>0.6312  | -0.0989<br>(60)<br>0.4475 |
|                            | Nitrogen dioxide (NO <sub>2</sub> )   | 0.3637<br>(60)<br>0.0052  | -0.6667<br>(60)<br>0.0000 | -0.4981<br>(60)<br>0.0001 | -0.3105<br>(60)<br>0.0171 | -0.0358<br>(60)<br>0.7836 | 0.0991<br>(60)<br>0.4467  |
|                            | Particles <10µm (PM <sub>10</sub> )   | -0.0390<br>(60)<br>0.7648 | -0.2963<br>(60)<br>0.0229 | -0.4581<br>(60)<br>0.0004 | -0.5637<br>(60)<br>0.0000 | -0.2905<br>(60)<br>0.0257 | -0.2769<br>(60)<br>0.0334 |
|                            | Particles <2.5µm (PM <sub>2.5</sub> ) | ND                        | ND                        | ND                        | ND                        | ND                        | ND                        |
|                            | Carbon monoxide (CO)                  | ND                        | ND                        | ND                        | ND                        | ND                        | ND                        |
|                            | Sulphur dioxide (SO <sub>2</sub> )    | 0.4488<br>(24)<br>0.0314  | -0.4563<br>(24)<br>0.0286 | -0.3724<br>(24)<br>0.0741 | -0.1431<br>(24)<br>0.4924 | 0.1500<br>(24)<br>0.4719  | 0.4749<br>(24)<br>0.0228  |
|                            |                                       |                           |                           |                           |                           |                           |                           |
| MADRID FACULTY OF PHARMACY | Ozone (O <sub>3</sub> )               | -0.4353<br>(60)<br>0.0008 | 0.7548<br>(60)<br>0.0000  | 0.5909<br>(60)<br>0.0000  | 0.6646<br>(60)<br>0.0000  | 0.3047<br>(60)<br>0.0192  | -0.0974<br>(60)<br>0.4542 |
|                            | Nitrogen dioxide (NO <sub>2</sub> )   | 0.0434<br>(60)<br>0.7389  | -0.4224<br>(60)<br>0.0012 | -0.3497<br>(60)<br>0.0072 | -0.4630<br>(60)<br>0.0004 | -0.3934<br>(60)<br>0.0025 | -0.1582<br>(60)<br>0.2244 |
|                            | Particles <10µm (PM <sub>10</sub> )   | -0.3120<br>(60)<br>0.0166 | 0.3290<br>(60)<br>0.0115  | 0.1547<br>(60)<br>0.2347  | 0.1410<br>(60)<br>0.2788  | -0.2358<br>(60)<br>0.0701 | -0.4238<br>(60)<br>0.0011 |
|                            | Particles <2.5µm (PM <sub>2.5</sub> ) | -0.0440<br>(60)<br>0.7353 | -0.0480<br>(60)<br>0.7126 | -0.1299<br>(60)<br>0.3185 | -0.2013<br>(60)<br>0.1220 | -0.3543<br>(60)<br>0.0065 | -0.3328<br>(60)<br>0.0106 |
|                            | Carbon monoxide (CO)                  | 0.3702<br>(60)<br>0.0045  | -0.4305<br>(60)<br>0.0009 | -0.2322<br>(60)<br>0.0746 | -0.3702<br>(60)<br>0.0045 | -0.0518<br>(60)<br>0.6905 | 0.1722<br>(60)<br>0.1859  |
|                            | Sulphur dioxide (SO <sub>2</sub> )    | 0.0898<br>(60)<br>0.4903  | -0.2245<br>(60)<br>0.0846 | -0.1901<br>(60)<br>0.1443 | -0.2600<br>(60)<br>0.0458 | -0.0928<br>(60)<br>0.4759 | 0.0123<br>(60)<br>0.9247  |
|                            |                                       |                           |                           |                           |                           |                           |                           |
| MADRID SALAMANCA DISTRICT  | Ozone (O <sub>3</sub> )               | -0.3685<br>(60)<br>0.0047 | 0.7984<br>(60)<br>0.0000  | 0.7084<br>(60)<br>0.0000  | 0.3515<br>(60)<br>0.0069  | 0.0690<br>(60)<br>0.5960  | 0.0008<br>(60)<br>0.9949  |
|                            | Nitrogen dioxide (NO <sub>2</sub> )   | 0.3167<br>(60)<br>0.0150  | -0.7325<br>(60)<br>0.0000 | -0.6283<br>(60)<br>0.0000 | -0.3428<br>(60)<br>0.0085 | -0.0935<br>(60)<br>0.4725 | -0.0163<br>(60)<br>0.9004 |
|                            | Particles <10µm (PM <sub>10</sub> )   | -0.2336<br>(60)<br>0.0727 | 0.1854<br>(60)<br>0.1544  | 0.0720<br>(60)<br>0.5803  | -0.1621<br>(60)<br>0.2131 | -0.3496<br>(60)<br>0.0072 | -0.2841<br>(60)<br>0.0291 |
|                            | Particles <2.5µm (PM <sub>2.5</sub> ) | ND                        | ND                        | ND                        | ND                        | ND                        | ND                        |
|                            |                                       |                           |                           |                           |                           |                           |                           |

|                     |                                       |                           |                           |                           |                           |                           |                           |
|---------------------|---------------------------------------|---------------------------|---------------------------|---------------------------|---------------------------|---------------------------|---------------------------|
|                     | Carbon monoxide (CO)                  | 0.3739<br>(60)<br>0.0041  | -0.4658<br>(60)<br>0.0003 | -0.3904<br>(60)<br>0.0027 | -0.1854<br>(60)<br>0.1544 | -0.0315<br>(60)<br>0.8089 | 0.0498<br>(60)<br>0.7023  |
|                     | Sulphur dioxide (SO <sub>2</sub> )    | 0.2844<br>(60)<br>0.0289  | -0.4886<br>(60)<br>0.0002 | -0.3743<br>(60)<br>0.0040 | -0.1317<br>(60)<br>0.3136 | -0.0397<br>(60)<br>0.7604 | 0.0607<br>(60)<br>0.6408  |
| MADRID<br>CITY HALL | Ozone (O <sub>3</sub> )               | -0.3864<br>(59)<br>0.0033 | 0.7151<br>(59)<br>0.0000  | 0.6351<br>(59)<br>0.0000  | 0.4573<br>(59)<br>0.0005  | 0.0480<br>(59)<br>0.7146  | -0.0795<br>(59)<br>0.5451 |
|                     | Nitrogen dioxide (NO <sub>2</sub> )   | 0.2438<br>(59)<br>0.0633  | -0.6468<br>(59)<br>0.0000 | -0.6577<br>(59)<br>0.0000 | -0.4878<br>(59)<br>0.0002 | -0.2129<br>(59)<br>0.1049 | -0.0438<br>(59)<br>0.7387 |
|                     | Particles <10µm (PM <sub>10</sub> )   | -0.4729<br>(59)<br>0.0003 | 0.2475<br>(59)<br>0.0595  | 0.0803<br>(59)<br>0.5410  | -0.0509<br>(59)<br>0.6981 | -0.4681<br>(59)<br>0.0004 | -0.5004<br>(59)<br>0.0001 |
|                     | Particles <2.5µm (PM <sub>2.5</sub> ) | -0.1355<br>(59)<br>0.3022 | -0.2139<br>(59)<br>0.1034 | -0.4130<br>(59)<br>0.0017 | -0.3860<br>(59)<br>0.0033 | -0.4970<br>(59)<br>0.0002 | -0.3328<br>(59)<br>0.0113 |
|                     | Carbon monoxide (CO)                  | 0.3225<br>(59)<br>0.0140  | -0.5770<br>(59)<br>0.0000 | -0.5475<br>(59)<br>0.0000 | -0.3706<br>(59)<br>0.0048 | 0.0283<br>(59)<br>0.8295  | 0.1565<br>(59)<br>0.2334  |
|                     | Sulphur dioxide (SO <sub>2</sub> )    | -0.0358<br>(59)<br>0.7849 | -0.2180<br>(59)<br>0.0968 | -0.3315<br>(59)<br>0.0116 | -0.1779<br>(59)<br>0.1755 | -0.2447<br>(59)<br>0.0624 | 0.0173<br>(59)<br>0.8955  |
|                     | Ozone (O <sub>3</sub> )               | -0.4767<br>(59)<br>0.0003 | 0.7877<br>(59)<br>0.0000  | 0.7203<br>(59)<br>0.0000  | 0.4058<br>(59)<br>0.0020  | 0.0191<br>(59)<br>0.8845  | -0.1860<br>(59)<br>0.1567 |
| GETAFE              | Nitrogen dioxide (NO <sub>2</sub> )   | 0.3910<br>(59)<br>0.0029  | -0.7006<br>(59)<br>0.0000 | -0.6800<br>(59)<br>0.0000 | -0.3554<br>(59)<br>0.0068 | -0.0837<br>(59)<br>0.5240 | 0.1211<br>(59)<br>0.3563  |
|                     | Particles <10µm (PM <sub>10</sub> )   | -0.0345<br>(59)<br>0.7925 | -0.1430<br>(59)<br>0.2762 | -0.2359<br>(59)<br>0.0724 | -0.1536<br>(59)<br>0.2421 | -0.2630<br>(59)<br>0.0452 | -0.2483<br>(59)<br>0.0587 |
|                     | Particles <2.5µm (PM <sub>2.5</sub> ) | ND                        | ND                        | ND                        | ND                        | ND                        | ND                        |
|                     | Carbon monoxide (CO)                  | ND                        | ND                        | ND                        | ND                        | ND                        | ND                        |
|                     | Sulphur dioxide (SO <sub>2</sub> )    | ND                        | ND                        | ND                        | ND                        | ND                        | ND                        |
|                     | Ozone (O <sub>3</sub> )               | -0.3883<br>(60)<br>0.0029 | 0.6758<br>(60)<br>0.0000  | 0.7780<br>(60)<br>0.0000  | 0.4237<br>(60)<br>0.0011  | 0.1643<br>(60)<br>0.2069  | -0.1654<br>(60)<br>0.2040 |
|                     | Nitrogen dioxide (NO <sub>2</sub> )   | 0.2876<br>(60)<br>0.0272  | -0.5622<br>(60)<br>0.0000 | -0.6954<br>(60)<br>0.0000 | -0.3778<br>(60)<br>0.0037 | -0.2256<br>(60)<br>0.0831 | 0.0913<br>(60)<br>0.4830  |
| LEGANÉS             | Particles <10µm (PM <sub>10</sub> )   | -0.0606<br>(60)<br>0.6417 | -0.0900<br>(60)<br>0.4896 | -0.2630<br>(60)<br>0.0434 | -0.3321<br>(60)<br>0.0107 | -0.2879<br>(60)<br>0.0270 | -0.2370<br>(60)<br>0.0687 |
|                     | Particles <2.5µm (PM <sub>2.5</sub> ) | ND                        | ND                        | ND                        | ND                        | ND                        | ND                        |
|                     |                                       |                           |                           |                           |                           |                           |                           |

|           |                                       |                           |                           |                           |                           |                           |                           |
|-----------|---------------------------------------|---------------------------|---------------------------|---------------------------|---------------------------|---------------------------|---------------------------|
|           | Carbon monoxide (CO)                  | ND                        | ND                        | ND                        | ND                        | ND                        | ND                        |
|           | Sulphur dioxide (SO <sub>2</sub> )    | ND                        | ND                        | ND                        | ND                        | ND                        | ND                        |
| LAS ROZAS | Ozone (O <sub>3</sub> )               | -0.5415<br>(60)<br>0.0000 | 0.7367<br>(60)<br>0.0000  | 0.7456<br>(60)<br>0.0000  | 0.4916<br>(60)<br>0.0000  | -0.0045<br>(60)<br>0.9726 | -0.1109<br>(60)<br>0.3945 |
|           | Nitrogen dioxide (NO <sub>2</sub> )   | 0.4061<br>(60)<br>0.0018  | -0.5722<br>(60)<br>0.0000 | -0.5886<br>(60)<br>0.0000 | -0.3648<br>(60)<br>0.0051 | -0.1189<br>(60)<br>0.3610 | 0.0377<br>(60)<br>0.7723  |
|           | Particles <10µm (PM <sub>10</sub> )   | -0.2406<br>(60)<br>0.0646 | 0.2900<br>(60)<br>0.0259  | -0.0228<br>(60)<br>0.8609 | -0.1361<br>(60)<br>0.2959 | -0.3613<br>(60)<br>0.0055 | -0.2229<br>(60)<br>0.0868 |
|           | Particles <2.5µm (PM <sub>2.5</sub> ) | ND                        | ND                        | ND                        | ND                        | ND                        | ND                        |
|           | Carbon monoxide (CO)                  | ND                        | ND                        | ND                        | ND                        | ND                        | ND                        |
|           | Sulphur dioxide (SO <sub>2</sub> )    | ND                        | ND                        | ND                        | ND                        | ND                        | ND                        |
|           |                                       |                           |                           |                           |                           |                           |                           |
| VILLALBA  | Ozone (O <sub>3</sub> )               | -0.4260<br>(60)<br>0.0011 | 0.7016<br>(60)<br>0.0000  | 0.5962<br>(60)<br>0.0000  | 0.4781<br>(60)<br>0.0002  | 0.1182<br>(60)<br>0.3639  | -0.1238<br>(60)<br>0.3417 |
|           | Nitrogen dioxide (NO <sub>2</sub> )   | 0.1519<br>(60)<br>0.2434  | -0.4994<br>(60)<br>0.0001 | -0.4563<br>(60)<br>0.0005 | -0.4876<br>(60)<br>0.0002 | -0.2112<br>(60)<br>0.1048 | -0.0004<br>(60)<br>0.9976 |
|           | Particles <10µm (PM <sub>10</sub> )   | -0.4339<br>(24)<br>0.0374 | 0.0360<br>(24)<br>0.8630  | 0.1635<br>(24)<br>0.4330  | -0.1441<br>(24)<br>0.4895 | -0.3529<br>(24)<br>0.0905 | -0.4186<br>(24)<br>0.0447 |
|           | Particles <2.5µm (PM <sub>2.5</sub> ) | 0.1837<br>(60)<br>0.1582  | -0.0853<br>(60)<br>0.5124 | -0.1281<br>(60)<br>0.3250 | -0.0987<br>(60)<br>0.4484 | -0.1577<br>(60)<br>0.2259 | -0.0220<br>(60)<br>0.8659 |
|           | Carbon monoxide (CO)                  | 0.6652<br>(24)<br>0.0014  | -0.5039<br>(24)<br>0.0157 | -0.4739<br>(24)<br>0.0230 | -0.0597<br>(24)<br>0.7745 | 0.2133<br>(24)<br>0.3064  | 0.5512<br>(24)<br>0.0082  |
|           | Sulphur dioxide (SO <sub>2</sub> )    | 0.5016<br>(60)<br>0.0001  | -0.2101<br>(60)<br>0.1066 | -0.1236<br>(60)<br>0.3424 | 0.1375<br>(60)<br>0.2908  | 0.3054<br>(60)<br>0.0190  | 0.3459<br>(60)<br>0.0079  |
|           |                                       |                           |                           |                           |                           |                           |                           |

ρ: Correlation (Spearman); (Sample size); *p*-value (in red when *p*<0.05); ND: no data are available for this variable for this station.

**Table S2.** Correlations between the variables “pollen type” and “airborne contaminant” in the five study zones where the values for airborne pollutants in the table differ from the mean in the different year levels specified (significant results shaded in orange):

| PALINOCAM NETWORK STATION | Airborne pollutant (by years) | <i>Cupressaceae</i> | <i>Olea</i>     | <i>Pinus</i>    | <i>Platanus</i> | <i>Populus</i>  | <i>Ulmus</i>   |
|---------------------------|-------------------------------|---------------------|-----------------|-----------------|-----------------|-----------------|----------------|
| ALCOBENDAS                | SO <sub>2</sub> 2013          | 0.2378<br>(12)      | -0.3481<br>(12) | -0.6515<br>(12) | -0.7146<br>(12) | -0.4367<br>(12) | 0.0858<br>(12) |
|                           |                               | 0.4304              | 0.2483          | 0.0307          | 0.0186          | 0.1475          | 0.7760         |

|                                  |                                            |                           |                           |                           |                           |                           |                           |
|----------------------------------|--------------------------------------------|---------------------------|---------------------------|---------------------------|---------------------------|---------------------------|---------------------------|
|                                  | SO <sub>2</sub><br>2014                    | 0.0280<br>(12)<br>0.9261  | -0.6199<br>(12)<br>0.0398 | -0.3986<br>(12)<br>0.1862 | -0.3408<br>(12)<br>0.2583 | 0.1285<br>(12)<br>0.6700  | -0.1816<br>(12)<br>0.5469 |
|                                  |                                            |                           |                           |                           |                           |                           |                           |
| COSLADA                          | PM <sub>10</sub><br>2013                   | 0.0629<br>(12)<br>0.8346  | -0.1761<br>(12)<br>0.5593 | -0.6294<br>(12)<br>0.0369 | -0.5730<br>(12)<br>0.0574 | -0.5908<br>(12)<br>0.0501 | -0.1248<br>(12)<br>0.6789 |
|                                  |                                            |                           |                           |                           |                           |                           |                           |
|                                  | PM <sub>10</sub><br>2014, 2015 and<br>2017 | 0.0278<br>(36)<br>0.8694  | -0.3782<br>(36)<br>0.0252 | -0.4512<br>(36)<br>0.0076 | -0.4953<br>(36)<br>0.0034 | -0.2223<br>(36)<br>0.1884 | -0.2785<br>(36)<br>0.0994 |
|                                  |                                            |                           |                           |                           |                           |                           |                           |
|                                  | PM <sub>10</sub><br>2016                   | -0.3077<br>(12)<br>0.3075 | -0.0234<br>(12)<br>0.9381 | -0.5639<br>(12)<br>0.0614 | -0.7619<br>(12)<br>0.0115 | -0.3952<br>(12)<br>0.1899 | -0.7018<br>(12)<br>0.0199 |
|                                  |                                            |                           |                           |                           |                           |                           |                           |
|                                  | NO <sub>2</sub><br>2013                    | -0.2238<br>(12)<br>0.4580 | -0.3521<br>(12)<br>0.2429 | -0.4056<br>(12)<br>0.1786 | -0.5254<br>(12)<br>0.0814 | -0.5376<br>(12)<br>0.0746 | -0.3743<br>(12)<br>0.2144 |
|                                  |                                            |                           |                           |                           |                           |                           |                           |
| MADRID<br>FACULTY OF<br>PHARMACY | NO <sub>2</sub><br>2014                    | 0.1399<br>(12)<br>0.6427  | -0.5873<br>(12)<br>0.0514 | -0.6503<br>(12)<br>0.0310 | -0.6084<br>(12)<br>0.0436 | -0.3216<br>(12)<br>0.2861 | -0.0141<br>(12)<br>0.9626 |
|                                  |                                            |                           |                           |                           |                           |                           |                           |
|                                  | NO <sub>2</sub><br>2017                    | 0.1748<br>(12)<br>0.5620  | -0.4578<br>(12)<br>0.1290 | -0.1259<br>(12)<br>0.6763 | -0.5804<br>(12)<br>0.0542 | -0.3471<br>(12)<br>0.2496 | -0.2136<br>(12)<br>0.4788 |
|                                  |                                            |                           |                           |                           |                           |                           |                           |
|                                  | NO <sub>2</sub><br>2015 and 2016           | 0.1957<br>(24)<br>0.3481  | -0.6305<br>(24)<br>0.0025 | -0.4304<br>(24)<br>0.0390 | -0.5658<br>(24)<br>0.0067 | -0.5069<br>(24)<br>0.0151 | -0.2407<br>(24)<br>0.2484 |
|                                  |                                            |                           |                           |                           |                           |                           |                           |
|                                  | CO<br>2013, 2014, 2016<br>and 2017         | 0.3079<br>(48)<br>0.0348  | -0.4096<br>(48)<br>0.0050 | -0.2496<br>(48)<br>0.0870 | -0.3916<br>(48)<br>0.0073 | -0.0859<br>(48)<br>0.5561 | 0.1478<br>(48)<br>0.3108  |
|                                  |                                            |                           |                           |                           |                           |                           |                           |
| MADRID<br>FACULTY OF<br>PHARMACY | CO<br>2015                                 | 0.8392<br>(12)<br>0.0054  | -0.8827<br>(12)<br>0.0034 | -0.4336<br>(12)<br>0.1504 | -0.3846<br>(12)<br>0.2021 | -0.0653<br>(12)<br>0.8286 | 0.4133<br>(12)<br>0.1704  |
|                                  |                                            |                           |                           |                           |                           |                           |                           |
| MADRID<br>FACULTY OF<br>PHARMACY | SO <sub>2</sub><br>2013, 2014 and<br>2017  | 0.0774<br>(36)<br>0.6472  | -0.4765<br>(36)<br>0.0048 | -0.4949<br>(36)<br>0.0034 | -0.4705<br>(36)<br>0.0054 | -0.2485<br>(36)<br>0.1415 | 0.0808<br>(36)<br>0.6327  |
|                                  |                                            |                           |                           |                           |                           |                           |                           |
|                                  | SO <sub>2</sub><br>2015 and 2016           | 0.4817<br>(24)<br>0.0209  | -0.1227<br>(24)<br>0.5563 | -0.0643<br>(24)<br>0.7576 | -0.0913<br>(24)<br>0.6614 | 0.1380<br>(24)<br>0.5081  | 0.1872<br>(24)<br>0.3692  |
|                                  |                                            |                           |                           |                           |                           |                           |                           |
| MADRID<br>SALAMANCA<br>DISTRICT  | PM <sub>10</sub><br>2016                   | -0.1049<br>(12)<br>0.7279 | -0.4912<br>(12)<br>0.1033 | -0.5359<br>(12)<br>0.0755 | -0.6976<br>(12)<br>0.0207 | -0.3553<br>(12)<br>0.2386 | 0.0000<br>(12)<br>1.0000  |
|                                  |                                            |                           |                           |                           |                           |                           |                           |
|                                  | PM <sub>10</sub><br>2017                   | 0.3007<br>(12)<br>0.3186  | 0.1649<br>(12)<br>0.5844  | 0.4448<br>(12)<br>0.1401  | -0.1885<br>(12)<br>0.5318 | 0.5684<br>(12)<br>0.0594  | 0.3695<br>(12)<br>0.2204  |
|                                  |                                            |                           |                           |                           |                           |                           |                           |
|                                  | PM <sub>10</sub><br>2013, 2014 and<br>2015 | -0.4653<br>(36)<br>0.0059 | 0.2810<br>(36)<br>0.0965  | 0.1418<br>(36)<br>0.4015  | -0.0942<br>(36)<br>0.5772 | -0.6834<br>(36)<br>0.0001 | -0.6318<br>(36)<br>0.0002 |
|                                  |                                            |                           |                           |                           |                           |                           |                           |
| MADRID<br>SALAMANCA<br>DISTRICT  | CO<br>2014                                 | -0.0070<br>(12)<br>0.9815 | -0.4794<br>(12)<br>0.1118 | -0.4333<br>(12)<br>0.1507 | -0.4319<br>(12)<br>0.1520 | -0.5539<br>(12)<br>0.0662 | -0.4687<br>(12)<br>0.1201 |
|                                  |                                            |                           |                           |                           |                           |                           |                           |
|                                  | CO<br>2015                                 | 0.3357<br>(12)<br>0.2656  | -0.5148<br>(12)<br>0.0877 | -0.4588<br>(12)<br>0.1281 | -0.4452<br>(12)<br>0.1398 | 0.5684<br>(12)<br>0.0594  | -0.2651<br>(12)<br>0.3792 |

|                     |                                  |                           |                           |                           |                           |                           |                           |
|---------------------|----------------------------------|---------------------------|---------------------------|---------------------------|---------------------------|---------------------------|---------------------------|
| MADRID<br>CITY HALL | CO<br>2013, 2016 and<br>2017     | 0.4432<br>(36)<br>0.0087  | -0.5672<br>(36)<br>0.0008 | -0.4735<br>(36)<br>0.0051 | -0.2801<br>(36)<br>0.0974 | 0.1519<br>(36)<br>0.3688  | 0.2058<br>(36)<br>0.2235  |
|                     | SO <sub>2</sub><br>2013          | -0.4909<br>(11)<br>0.1206 | 0.1193<br>(11)<br>0.7060  | -0.1727<br>(11)<br>0.5849 | -0.3280<br>(11)<br>0.2996 | -0.6989<br>(11)<br>0.0271 | -0.7931<br>(11)<br>0.0121 |
|                     | SO <sub>2</sub><br>2014          | 0.3706<br>(12)<br>0.2190  | -0.3630<br>(12)<br>0.2286 | -0.0210<br>(12)<br>0.9445 | 0.0385<br>(12)<br>0.8983  | 0.2996<br>(12)<br>0.3205  | 0.4755<br>(12)<br>0.1148  |
|                     | SO <sub>2</sub><br>2017          | -0.2382<br>(12)<br>0.4296 | -0.2316<br>(12)<br>0.4424 | -0.1541<br>(12)<br>0.6092 | -0.2667<br>(12)<br>0.3836 | -0.4730<br>(12)<br>0.1167 | -0.5639<br>(12)<br>0.0614 |
|                     | SO <sub>2</sub><br>2015 and 2016 | -0.0087<br>(24)<br>0.9667 | -0.5980<br>(24)<br>0.0041 | -0.6886<br>(24)<br>0.0010 | -0.4710<br>(24)<br>0.0239 | -0.5401<br>(24)<br>0.0096 | -0.0950<br>(24)<br>0.6486 |

q: Correlation (Spearman); (Sample size); *p*-value (in red when  $p < 0.05$ ).
